# Supplementary material for: A unique co-crystallisation motif for bis(4-pyridyl)acetylene involving S⋯spC interactions with a fused 1,3-dithiole ring
Source: Royal Society of Chemistry journal article supplement (doi:10.1039/c003838e), 2010-01-01
Supplement: c003838e.pdf [file c003838e.pdf]

## A unique co-crystallization motif for bis(4-pyridyl)acetylene involving S $\cdots$ spC interactions with a fused 1,3-dithiole ring

Sandra I. G. Dias,<sup>a</sup> Sandra Rabaça,<sup>a</sup> Isabel C. Santos,<sup>a</sup> John D. Wallis<sup>b</sup> and Manuel Almeida<sup>\*a</sup>

<sup>a</sup> Dept. Química, Instituto Tecnológico e Nuclear / CFMCUL, Estrada Nacional 10, 2686-953 Sacavém, Portugal. Fax: +351 219 941455; Tel: +351 219946171; E-mail: [malmeida@itn.pt](mailto:malmeida@itn.pt)

<sup>b</sup> School of Biomedical Sciences, Nottingham Trent University, Clifton Lane, Nottingham NG11 8NS, UK.

**Table S1:** Selected bond lengths (Å) of co-crystal 4.

| Bond         | Distance (Å) |
|--------------|--------------|
| C(1)–O(1)    | 1.198(3)     |
| C(1)–S(1)    | 1.775(2)     |
| C(1)–S(2)    | 1.789(2)     |
| N(1)–C(8)    | 1.341(3)     |
| N(1)–C(9)    | 1.338(3)     |
| N(2)–C(13)   | 1.336(3)     |
| N(2)–C(14)   | 1.324(3)     |
| C(16)–C(16#) | 1.199(4)     |
| C(16)–C(17)  | 1.433(3)     |
| N(3)–C(19)   | 1.326(3)     |
| N(3)–C(20)   | 1.340(3)     |

**Table S2:** Selected bond angles (°) of co-crystal 4.

| Bond             | Angle(°)   |
|------------------|------------|
| C(1)–S(2)–C(3)   | 95.74(11)  |
| C(1)–S(1)–C(2)   | 95.75(10)  |
| C(3)–S(4)–C(5)   | 100.61(10) |
| C(2)–S(3)–C(4)   | 100.03(10) |
| S(4)–C(5)–C(11)  | 113.19(14) |
| S(3)–C(4)–C(6)   | 112.64(13) |
| C(14)–N(2)–C(13) | 116.28(18) |
| C(8)–N(1)–C(9)   | 116.12(19) |
| C(20)–N(3)–C(19) | 116.1(19)  |
